# Supplementary material for: Optimal percentage of inhibitory synapses in multi-task learning
Source: PubMed Central journal article supplement (PMC4405698; doi:10.1038/srep09895), 2015-04-22
Supplement: srep09895-s1.pdf [file srep09895-s1.pdf]

# Optimal percentage of inhibitory synapses in multi-task learning

Vittorio Capano

*Physics Department, University of Naples Federico II, Napoli, Italy*

Hans J. Herrmann

*Institute Computational Physics for Engineering Materials,*

*ETH, Zürich, CH; Departamento de Física,*

*Universidade Federal do Ceará, 60451-970 Fortaleza, Ceará, Brazil*

Lucilla de Arcangelis

*Department of Industrial and Information Engineering,*

*Second University of Naples and INFN Gr. Coll. Salerno, Aversa (CE), Italy*

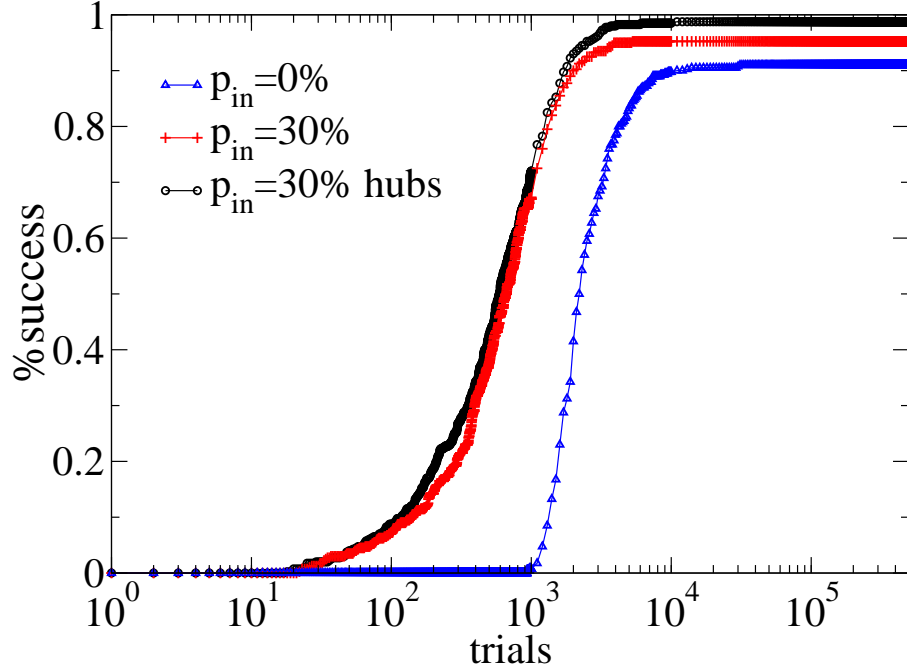

**Supplementary Figure 1.** Percentage of networks giving the right answer to the XOR rule as a function of the number of times the rule is applied for 500 configurations with  $N = 250$  neurons ( $k_d = 3$ ,  $\alpha = 0.001$ , homeostatic plasticity). Three different cases are analysed: purely excitatory networks, networks with  $p_{in} = 30\%$  inhibitory synapses with random connectivity degree and networks where inhibitory synapses are assigned to random neurons with  $k_{out} > 10$ . The best performance is obtained for inhibitory neurons highly connected also for different plastic adaptations. The same behaviour is observed also for other rules and other values of  $p_{in} > 0$ .

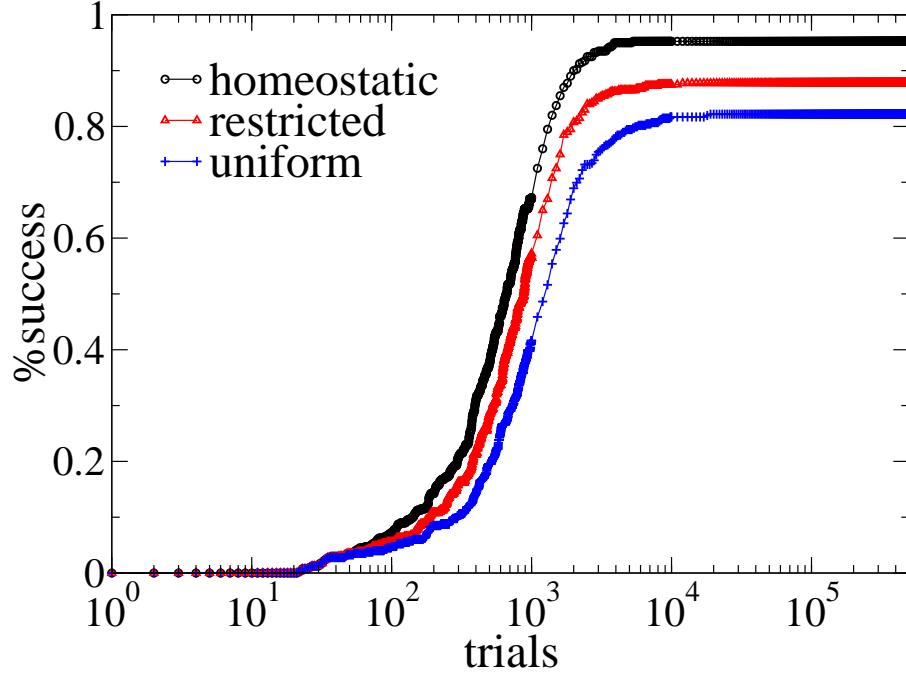

**Supplementary Figure 2.** Percentage of networks giving the right answer to the XOR rule as a function of the number of times the rule is applied for 500 configurations with  $N = 250$  neurons ( $k_d = 3$ ,  $\alpha = 0.001$ ,  $p_{in} = 0.3$  no hubs). Three different plastic adaptations are analysed: Uniform (all active synapses undergo the same modification independently of their excitatory/inhibitor character), restricted (only excitatory synapses are modified), homeostatic (excitatory and inhibitory synapses undergo modifications with opposite sign). The best performance is obtained for homeostatic plasticity, also for different  $p_{in}$  and hub inhibitory neurons. The same behaviour is observed also for the other rules.

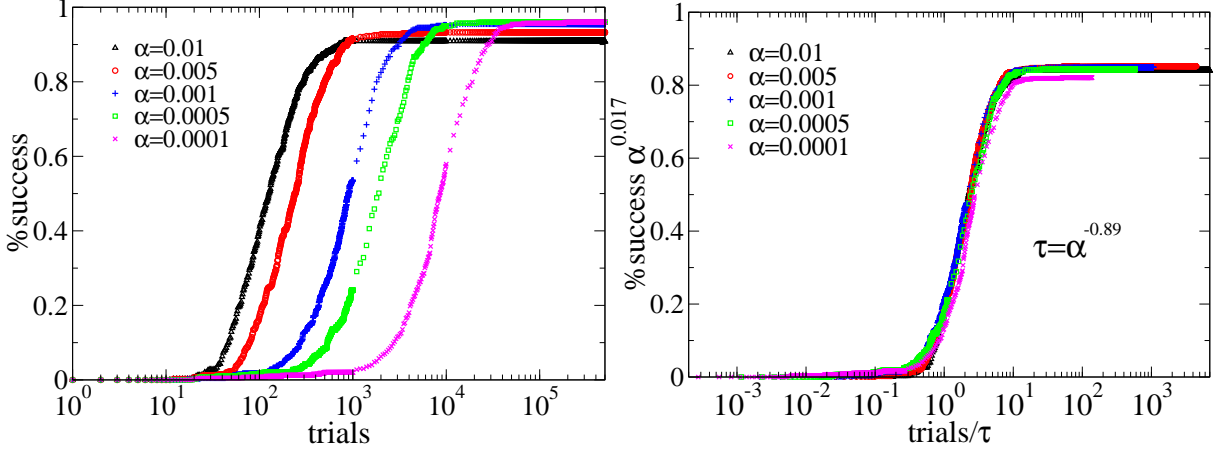

**Supplementary Figure 3.** Left: Percentage of networks giving the right answer to the parallel learning of XOR and AND rules as a function of the number of times the rule is applied for 500 configurations of networks with  $N = 250$  neurons and different  $\alpha$  ( $k_d = 3$ ,  $p_{in} = 0.3$ ). The average learning time  $\tau$  increases for decreasing  $\alpha$ , as  $\tau \sim \alpha^{-0.89}$ , whereas the best performance increases for slow plastic adaptations, as  $\sim \alpha^{-0.017}$ . Right: Universal learning curve obtained by rescaling the axes according to  $S = \alpha^{-0.017} f(t/\tau)$ . The scaling relations obtained for single rule learning are  $\tau \sim \alpha^{-1}$  and  $S = \alpha^{-0.05} f(t/\tau)$ .

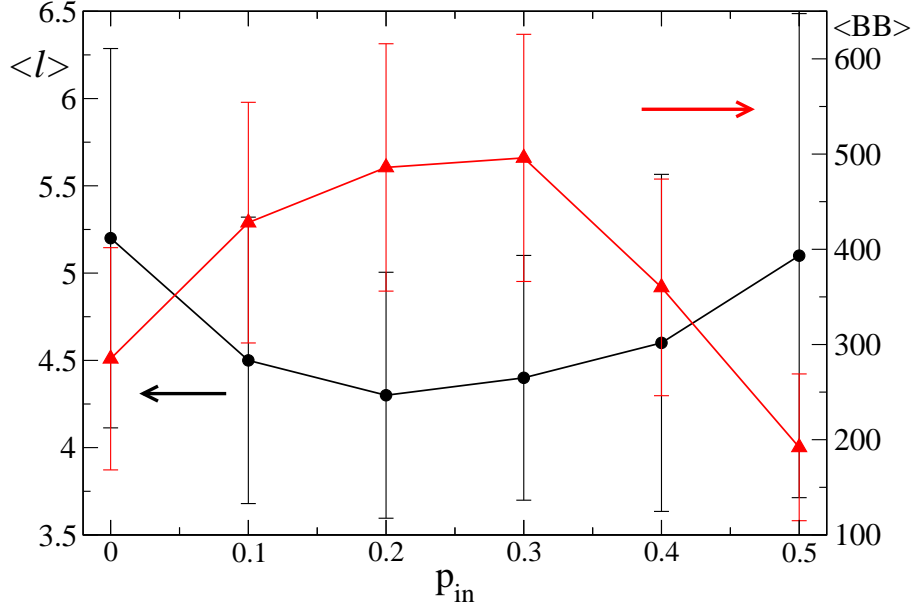

**Supplementary Figure 4.** The average number of neurons involved in avalanches giving the right answer to, both, the AND and XOR rules,  $\langle BB \rangle$ , for 500 configurations of networks with  $N = 1000$  neurons and different percentages of inhibitory synapses ( $k_d = 3$ ,  $\alpha = 0.001$ ). The maximum value is detected for  $p_{in}$  close to 20-30%. Correspondingly, the average shortest path,  $\langle l \rangle$ , connecting input and output neurons exhibits a minimum value in this range.

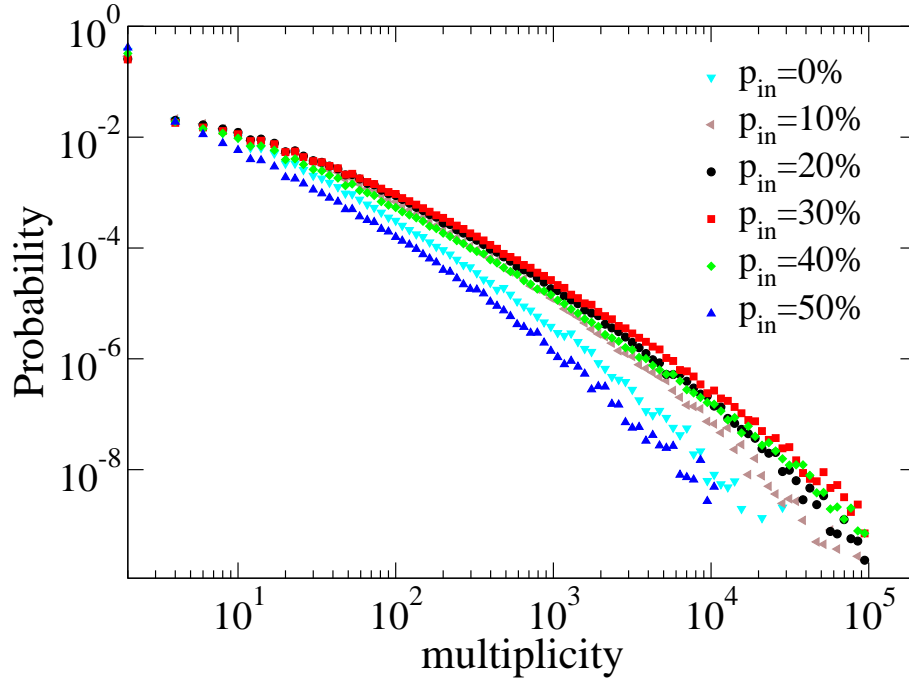

**Supplementary Figure 5.** Distribution of single neuron multiplicity, i.e., number of independent synaptic paths passing through a neuron, for backbones obtained by learning both the AND and XOR rules. Data are collected from 500 configurations of networks with  $N = 1000$  neurons and different percentages of inhibitory synapses ( $k_d = 3$ ,  $\alpha = 0.001$ ). The behaviour of the distribution is non-monotonic with  $p_{in}$ : Larger values of the multiplicity are observed for 30% inhibitory synapses, suggesting that the backbone is organized in a more intricate structure of interconnected neurons for this fraction of inhibitory synapses.
